# Supplementary material
Source: publisher site journal article supplement (https://www.dovepress.com/article/549951)
Supplement: Supplementary file 1 [file 549951%20Revised%20appendix.pdf]

## Questionnaire study TYS SC VS IV - Translated to English

---

### Frågeformulär\_Patient sjukhus\_intravenous

---

|                                                                              | <b>Variable Name</b> | <b>Answer Options</b>                                                                                                        |
|------------------------------------------------------------------------------|----------------------|------------------------------------------------------------------------------------------------------------------------------|
| <b>Age</b>                                                                   |                      | 18-25 years<br>26-35 years<br>36-45 years<br>46-55 years<br>56-65 years<br>>66 years                                         |
| <b>Gender</b>                                                                |                      | Woman<br>Man<br>Non-binary<br>Prefer not to say                                                                              |
| <b>How long have you been receiving intravenous Tysabri treatment?</b>       |                      | <0.5 years<br>0.5-1 year<br>1-1.5 years<br>1.5-2 years<br>2-3 years<br>>3 years                                              |
| <b>When did you receive your most recent intravenous Tysabri treatment?</b>  |                      | ≤ 1 month ago<br>1-2 months ago<br>3-4 months ago<br>>4 months ago                                                           |
| <b>Intravenous Tysabri treatment disrupts or limits my daily activities.</b> |                      | Does not apply at all<br>Partially applies<br>"Applies well, it is often limiting"<br>"Fully applies, it is always limiting" |
| <b>On the days I receive treatment, it affects my attendance at work.</b>    |                      | Always<br>Sometimes<br>Never                                                                                                 |
| <b>On the days I receive treatment, I need to be away from work for</b>      |                      | <1 hour<br>1-2 hours<br>2-3 hours<br>3-4 hours<br>4-5 hours<br>5-6 hours<br>>6 hours                                         |
| <b>When I need to be away from work, it is in the form of:</b>               |                      | Vacation<br>Overtime /<br>Compensated Time /<br>Flex Time                                                                    |

| Variable Name                                                                                                                                                                                                                                                                                              | Answer Options                                                                                                                     |
|------------------------------------------------------------------------------------------------------------------------------------------------------------------------------------------------------------------------------------------------------------------------------------------------------------|------------------------------------------------------------------------------------------------------------------------------------|
| <b>How often do you discuss issues regarding your illness or treatment with the nurses during the infusion of Tysabri IV?</b>                                                                                                                                                                              | Sick leave<br>Never<br>Rarely<br>Occasionally<br>Often<br>Always                                                                   |
| <b>How much time does it take for you to receive intravenous Tysabri treatment at the hospital?</b> <i>(From the time you arrive at the hospital until you leave the hospital)</i>                                                                                                                         | 1-1.5 hours<br>1.5-2 hours<br>2-2.5 hours<br>>2.5 hours                                                                            |
| <b>How much time have you spent traveling to and from the hospital for your treatment?</b> <i>(From the time you leave your home or workplace until you arrive at the hospital, plus the travel time back from the hospital to your home or workplace. Do not include the time spent at the hospital.)</i> | <15 minutes<br>15-30 minutes<br>30-45 minutes<br>45 minutes-1 hour<br>1-1.5 hours<br>1.5-2 hours<br>2-3 hours<br>More than 3 hours |
| <b>I perceive the time spent, including travel time and time at the hospital, for each treatment session with intravenous Tysabri as negative.</b>                                                                                                                                                         | Does not apply at all<br>Partially applies<br>Applies well, it often feels negative<br>Fully applies, it always feels negative     |

---

*Frågeformulär\_Patient sjukhus\_subcutaneous*

---

## Demographics

| Variable Name | Answer Options                                                          |
|---------------|-------------------------------------------------------------------------|
| Age           | 18-25 years<br>26-35 years<br>36-45 years<br>46-55 years<br>56-65 years |

| Variable Name                                                                | Answer Options                                                     |
|------------------------------------------------------------------------------|--------------------------------------------------------------------|
| <b>Gender</b>                                                                | >66 years<br>Woman<br>Man<br>Non-binary<br>Prefer not to say       |
| <b>How many times have you received subcutaneous Tysabri treatment?</b>      | <3 times<br>3-6 times<br>7-9 times<br>>9 times                     |
| <b>When did you receive your most recent subcutaneous Tysabri treatment?</b> | ≤ 1 month ago<br>1-2 months ago<br>3-4 months ago<br>>4 months ago |

---

### II) Patient Experience (Subcutaneous)

| Variable Name                                                                      | Answer Options                                                                                                               |
|------------------------------------------------------------------------------------|------------------------------------------------------------------------------------------------------------------------------|
| -----<br>-----                                                                     | -----<br>-----<br>-----                                                                                                      |
| <b>1. Subcutaneous Tysabri treatment disrupts or limits my daily activities.</b>   | Does not apply at all<br>Partially applies<br>"Applies well, it is often limiting"<br>"Fully applies, it is always limiting" |
| <b>2. On the days I receive treatment, it affects my attendance at work.</b>       | Always<br>Sometimes<br>Never                                                                                                 |
| <b>3. On the days I receive treatment, I need to be away from work for</b>         | <1 hour<br>1-2 hours<br>2-3 hours<br>3-4 hours<br>4-5 hours<br>5-6 hours<br>>6 hours                                         |
| <b>4. When I need to be away from work for my treatment, it is in the form of:</b> | Vacation<br>Overtime / Compensated Time / Flex Time<br>Sick leave                                                            |

| Variable Name                                                                                                                                               | Answer Options                                                                                                                                                                                       |
|-------------------------------------------------------------------------------------------------------------------------------------------------------------|------------------------------------------------------------------------------------------------------------------------------------------------------------------------------------------------------|
| 5. How often do you discuss issues regarding your illness or treatment with the nurses during the subcutaneous Tysabri injection?                           | Never<br><br>Rarely<br>Occasionally<br>Often<br>Always                                                                                                                                               |
| 6. How much time does it take for you to receive subcutaneous Tysabri treatment at the hospital? (From the time you arrive at the hospital until you leave) | <15 minutes<br><br>15-30 minutes<br>30-45 minutes<br>45-60 minutes<br>60-75 minutes<br>>75 minutes                                                                                                   |
| 7. How much time have you spent traveling to and from the hospital for your treatment?                                                                      | <15 minutes<br><br>15-30 minutes<br>30-45 minutes<br>45 minutes-1 hour<br>1-1.5 hours<br>1.5-2 hours<br>2-3 hours<br>>3 hours                                                                        |
| I perceive the time spent, including travel time plus time at the hospital, for each treatment session with subcutaneous Tysabri as negative.               | Does not apply at all<br><br>Partially applies<br>"Applies well, it often feels negative"<br>"Fully applies, it is always negative"                                                                  |
| I perceive, from a time perspective, that there is an advantage with subcutaneous Tysabri treatment compared to intravenous treatment.                      | "Does not apply at all, there is no advantage"<br><br>"Partially applies, there is a slight advantage"<br>"Applies well, there is an advantage"<br>"Fully applies, there is a significant advantage" |
| How often do you discuss issues regarding your illness or treatment with the nurses during the subcutaneous Tysabri injection?                              | Never<br><br>Rarely<br>Occasionally                                                                                                                                                                  |

| Variable Name                                                                                                                                                                                                                 | Answer Options                                                                                                                                                                                                                                                                                                                                                                                                            |
|-------------------------------------------------------------------------------------------------------------------------------------------------------------------------------------------------------------------------------|---------------------------------------------------------------------------------------------------------------------------------------------------------------------------------------------------------------------------------------------------------------------------------------------------------------------------------------------------------------------------------------------------------------------------|
| <p><b>The subcutaneous Tysabri injection treatment has not affected my ability to discuss relevant issues about my illness and treatment with healthcare professionals compared to the intravenous Tysabri treatment.</b></p> | <p>Often<br/>Always</p> <p>"Does not apply at all, I have no opportunity to discuss"</p>                                                                                                                                                                                                                                                                                                                                  |
| <p><b>When considering all factors, which option best describes you?</b></p>                                                                                                                                                  | <p>"Partially applies, fewer opportunities to discuss"</p> <p>"Applies well, I still have the opportunity to discuss"</p> <p>"Fully applies, I have more opportunities to discuss"</p> <p>I prefer the subcutaneous injection compared to the intravenous infusion in the arm.</p> <p>I prefer the intravenous infusion in the arm compared to the subcutaneous injection.</p> <p>I prefer neither one nor the other.</p> |
| <p><b>If you think one option is better than the other, how much better do you think it is?</b></p>                                                                                                                           | <p>Much better</p> <p>Better</p> <p>Slightly better</p>                                                                                                                                                                                                                                                                                                                                                                   |
| <p><b>If you think one of the treatment options is better, what are the TWO main reasons?</b></p>                                                                                                                             | <p>Is less emotionally stressful</p> <p>Requires me to spend less time at the hospital</p> <p>Causes less pain during administration</p> <p>Feels more comfortable during the administration of the treatment</p> <p>I get more time to talk to the staff at the hospital/nurse about my illness and treatment</p> <p>Some other reason</p>                                                                               |

---

*Frågeformulär\_Patient primärvård*

---

## I) Demographics

| Variable Name                                                                                        | Answer Options                                                                       |
|------------------------------------------------------------------------------------------------------|--------------------------------------------------------------------------------------|
| <b>i) Age</b>                                                                                        | 18-25 years<br>26-35 years<br>36-45 years<br>46-55 years<br>56-65 years<br>>66 years |
| <b>ii) Gender</b>                                                                                    | Woman<br>Man<br>Non-binary<br>Prefer not to say                                      |
| <b>iii) How many times have you received subcutaneous Tysabri treatment?</b>                         | <3 times<br>3-6 times<br>7-9 times<br>>9 times                                       |
| <b>iv) When did you receive your most recent subcutaneous Tysabri treatment at the hospital?</b>     | 1-3 months ago<br>4-6 months ago<br>7-12 months ago                                  |
| <b>v) When did you receive your most recent subcutaneous Tysabri treatment at the health center?</b> | ≤ 1 month ago<br>1-2 months ago<br>3-4 months ago<br>>4 months ago                   |

---

### II) Patient Experience (Intravenous)

| Variable Name                                                                                         | Answer Options                                                                                                           |
|-------------------------------------------------------------------------------------------------------|--------------------------------------------------------------------------------------------------------------------------|
| -----<br>-----<br>-----                                                                               | -----<br>-----<br>-----                                                                                                  |
| <b>1. Subcutaneous Tysabri treatment at the health center disrupts or limits my daily activities.</b> | Does not apply at all<br>Partially applies<br>Applies well, it is often limiting<br>Fully applies, it is always limiting |
| <b>2. On the days I receive treatment at the health center, it affects my attendance at work.</b>     | Always<br>Sometimes<br>Never                                                                                             |

| Variable Name                                                                                                                                                                                                                                                | Answer Options                                                                                                                                                                                                                                                                                                                                                                                            |
|--------------------------------------------------------------------------------------------------------------------------------------------------------------------------------------------------------------------------------------------------------------|-----------------------------------------------------------------------------------------------------------------------------------------------------------------------------------------------------------------------------------------------------------------------------------------------------------------------------------------------------------------------------------------------------------|
| 3. On the days I receive treatment at the health center, I need to be away from work for:                                                                                                                                                                    | <ul style="list-style-type: none"> <li>&lt;1 hour</li> <li>1-2 hours</li> <li>2-3 hours</li> <li>3-4 hours</li> <li>4-5 hours</li> <li>5-6 hours</li> <li>&gt;6 hours</li> </ul>                                                                                                                                                                                                                          |
| 4. When I need to be away from work for my treatment, it is in the form of:                                                                                                                                                                                  | <ul style="list-style-type: none"> <li>Vacation</li> <li>Overtime/Compensated Time/Flex Time</li> <li>Sick leave</li> </ul>                                                                                                                                                                                                                                                                               |
| 5. How often do you discuss issues regarding your illness or treatment with the nurses during the Tysabri injection at the health center?                                                                                                                    | <ul style="list-style-type: none"> <li>Never</li> <li>Rarely</li> <li>Occasionally</li> <li>Often</li> <li>Always</li> </ul>                                                                                                                                                                                                                                                                              |
| 6. I feel comfortable receiving the Tysabri treatment at the health center.                                                                                                                                                                                  | <ul style="list-style-type: none"> <li>Does not apply at all, I never feel comfortable receiving treatment at the health center</li> <li>Partially applies, I feel neither comfortable nor uncomfortable</li> <li>Applies well, I usually feel comfortable receiving treatment at the health center</li> <li>Fully applies, I always feel comfortable receiving treatment at the health center</li> </ul> |
| 7. How much total time does it take for you to receive subcutaneous Tysabri treatment at the health center?                                                                                                                                                  | <ul style="list-style-type: none"> <li>&lt;15 minutes</li> <li>15-30 minutes</li> <li>30-45 minutes</li> <li>45-60 minutes</li> <li>60-75 minutes</li> <li>&gt;75 minutes</li> </ul>                                                                                                                                                                                                                      |
| 8. How much time have you spent traveling to and from the health center for your treatment? (From the time you leave home or work until you arrive at the health center, plus the return trip back to home or work, not including time at the health center) | <ul style="list-style-type: none"> <li>&lt;15 minutes</li> <li>15-30 minutes</li> <li>30-45 minutes</li> </ul>                                                                                                                                                                                                                                                                                            |

| Variable Name                                                                                                                                                                                                                                 | Answer Options                                                                                                                                                                                                                                                                 |
|-----------------------------------------------------------------------------------------------------------------------------------------------------------------------------------------------------------------------------------------------|--------------------------------------------------------------------------------------------------------------------------------------------------------------------------------------------------------------------------------------------------------------------------------|
| <p><b>9. I perceive the time spent, travel time plus time at the health center, for each treatment session with subcutaneous Tysabri as negative.</b></p>                                                                                     | <p>45-60 minutes<br/>60-75 minutes<br/>74-90 minutes<br/>&gt;90 minutes</p> <p>Does not apply at all</p> <p>Partially applies<br/>Applies well, it often feels negative<br/>Fully applies, it is always negative</p>                                                           |
| <p><b>10. I perceive, from a time perspective, that it is an advantage to receive treatment at the health center compared to the hospital.</b></p>                                                                                            | <p>Does not apply at all, there is no advantage</p> <p>Partially applies, there is a slight advantage<br/>Applies well, there is an advantage<br/>Fully applies, it is a significant advantage</p>                                                                             |
| <p><b>11. Receiving Tysabri treatment at the health center has not affected my ability to discuss relevant issues about my illness and treatment with healthcare professionals compared to when I received treatment at the hospital.</b></p> | <p>Does not apply at all, I have no opportunity to discuss</p> <p>"Partially applies, fewer opportunities to discuss"<br/>Applies well, I still have the opportunity to discuss<br/>Fully applies, I have more opportunities to discuss</p>                                    |
| <p><b>12. It feels equally safe to receive Tysabri treatment at the health center as it does at the hospital.</b></p>                                                                                                                         | <p>Does not apply at all, I felt safer receiving treatment at the hospital<br/>Partially applies, I felt slightly safer receiving treatment at the hospital<br/>Applies well, I feel equally safe<br/>Fully applies, I feel safer receiving treatment at the health center</p> |
| <p><b>13. When considering all factors, which option best describes you?</b></p>                                                                                                                                                              | <p>I prefer receiving Tysabri treatment at the health center compared to the hospital.<br/>I prefer receiving Tysabri treatment at the hospital compared to the health center.<br/>I prefer neither one nor the other.</p>                                                     |
| <p><b>14. If you think one option is better than the other, how much better do you think it is?</b></p>                                                                                                                                       | <p>Much better<br/>Better<br/>Slightly better</p>                                                                                                                                                                                                                              |

| Variable Name                                                                                                                                                             | Answer Options                                                                                                                                                                                                                                                       |
|---------------------------------------------------------------------------------------------------------------------------------------------------------------------------|----------------------------------------------------------------------------------------------------------------------------------------------------------------------------------------------------------------------------------------------------------------------|
| <b>15. If you think one of the options for receiving Tysabri treatment at the health center or hospital is better, what are the TWO main reasons for your preference?</b> | <p>Is less emotionally stressful</p> <p>It is less time-consuming</p> <p>I feel safer with the treatment</p> <p>I get more time to talk to the staff about my illness and treatment</p> <p>I do not need to visit the hospital as often</p> <p>Some other reason</p> |

---

*Frågeformulär\_Sköterskor sjukhus*

---

## I) IV Treatment

| Variable Name                                                                                                                             | Answer Options                                                                                                  |
|-------------------------------------------------------------------------------------------------------------------------------------------|-----------------------------------------------------------------------------------------------------------------|
| <b>1. How long does it take to prepare for the infusion with Tysabri IV?</b>                                                              | <p>&lt;10 minutes</p> <p>10–15 minutes</p> <p>16–20 minutes</p> <p>21–25 minutes</p> <p>26–30 minutes</p>       |
| <b>2. How long does it take from the time the patient is assigned an infusion spot until the Tysabri IV treatment is fully completed?</b> | <p>&lt;60 minutes</p> <p>60–80 minutes</p> <p>81–100 minutes</p> <p>101–120 minutes</p> <p>&gt;120 minutes</p>  |
| <b>3. Does the time specified above include monitoring?</b>                                                                               | <p>No</p> <p>Yes</p>                                                                                            |
| <b>4. If monitoring is included, how long does it take?</b>                                                                               | <p>&lt;30 minutes</p> <p>30–45 minutes</p> <p>46–60 minutes</p>                                                 |
| <b>5. What is the total time, from when the patient registers their arrival at the treatment clinic until they leave the clinic?</b>      | <p>60–80 minutes</p> <p>81–100 minutes</p> <p>101–120 minutes</p> <p>121–140 minutes</p> <p>141–160 minutes</p> |

| Variable Name                                                                                                                                 | Answer Options |
|-----------------------------------------------------------------------------------------------------------------------------------------------|----------------|
| <b>6. How often does the patient discuss issues regarding their illness or treatment with you nurses during the infusion with Tysabri IV?</b> | > 160 minutes  |
|                                                                                                                                               | Never          |
|                                                                                                                                               | Rarely         |
|                                                                                                                                               | Occasionally   |
|                                                                                                                                               | Often          |
|                                                                                                                                               | Always         |

---

## II) SC Treatment

| Variable Name                                                                                                                                                                      | Answer Options |
|------------------------------------------------------------------------------------------------------------------------------------------------------------------------------------|----------------|
| -----                                                                                                                                                                              |                |
| -----                                                                                                                                                                              |                |
| -----                                                                                                                                                                              |                |
| <b>7. How long does it take to prepare for the treatment with Tysabri SC? (Include only active working time, i.e., not the time for bringing the syringes to room temperature)</b> | <5 minutes     |
|                                                                                                                                                                                    | 5–10 minutes   |
|                                                                                                                                                                                    | 11–15 minutes  |
|                                                                                                                                                                                    | 16–20 minutes  |
| <b>8. How long does it take to administer the Tysabri SC injection to the patient?</b>                                                                                             | <5 minutes     |
|                                                                                                                                                                                    | 5–10 minutes   |
|                                                                                                                                                                                    | 11–15 minutes  |
|                                                                                                                                                                                    | 16–20 minutes  |
|                                                                                                                                                                                    | 21–25 minutes  |
|                                                                                                                                                                                    | 26–30 minutes  |
| <b>9. How long does it take from the time the patient is assigned a spot for the injection until the Tysabri SC injection is fully completed?</b>                                  | <10 minutes    |
|                                                                                                                                                                                    | 10–15 minutes  |
|                                                                                                                                                                                    | 16–20 minutes  |
|                                                                                                                                                                                    | 21–25 minutes  |
|                                                                                                                                                                                    | 26–30 minutes  |
| <b>10. Is the patient monitored after the subcutaneous injection?</b>                                                                                                              | No             |
|                                                                                                                                                                                    | Yes            |
|                                                                                                                                                                                    | Sometimes      |
| <b>11. If monitoring is performed, how long does it take?</b>                                                                                                                      | <30 minutes    |
|                                                                                                                                                                                    | 30–45 minutes  |
|                                                                                                                                                                                    | 46–60 minutes  |
| <b>12. What is the total time, from when the patient registers their arrival at the treatment clinic until they leave the clinic?</b>                                              | <15 minutes    |

| Variable Name                                                                                                                                                                                   | Answer Options                                                                                                                                                                                       |
|-------------------------------------------------------------------------------------------------------------------------------------------------------------------------------------------------|------------------------------------------------------------------------------------------------------------------------------------------------------------------------------------------------------|
| <b>13. How often does the patient discuss issues regarding their illness or treatment with you nurses during the Tysabri SC injection?</b>                                                      | 15–30 minutes<br>31–45 minutes<br>45–60 minutes<br>>60 minutes                                                                                                                                       |
| <b>14. It is easy to inform the patient about the switch from Tysabri IV to Tysabri SC treatment.</b>                                                                                           | Never<br><br>Rarely<br>Occasionally<br>Often<br>Always<br>"Does not apply at all, it is never easy"<br>Partially applies<br>"Applies well, it is usually easy"<br>"Fully applies, it is always easy" |
| <b>15. The information and knowledge you have about Tysabri SC are sufficient to inform patients about the transition from IV to SC.</b>                                                        | "Does not apply at all, I lack information"<br><br>"Partially applies, but I wish for more information"<br>"Fully applies, I have sufficient information"                                            |
| <b>16. What proportion of patients who have been asked to switch from IV to SC, including those not participating in the study, are positive and have agreed to start Tysabri SC treatment?</b> | <50%<br><br>50–65%<br>65–80%<br>80–90%<br>90–95%<br>>95%                                                                                                                                             |
| <b>17. The transition from Tysabri IV to SC is positive for your treatment clinic from a time-saving perspective.</b>                                                                           | "Does not apply at all, no time savings"<br>"Partially applies, some time savings"<br>"Applies well, time savings are made"<br>"Fully applies, significant time savings"                             |
| <b>18. I perceive that there are more advantages to subcutaneous administration compared to intravenous administration of</b>                                                                   | Does not apply at all                                                                                                                                                                                |

| Variable Name                                                                         | Answer Options                                     |
|---------------------------------------------------------------------------------------|----------------------------------------------------|
| <b>Tysabri, beyond the possibility of time savings, such as patient satisfaction.</b> | Partially applies<br>Applies well<br>Fully applies |

---

*Frågeformulär\_Sköterskor primärvård*

---

| Variable Name                                                                                                                                                             | Answer Options                                                                                                                                      |
|---------------------------------------------------------------------------------------------------------------------------------------------------------------------------|-----------------------------------------------------------------------------------------------------------------------------------------------------|
| <b>1. The transition of Tysabri SC administration from hospital to primary care has worked well.</b>                                                                      | Does not apply at all<br><br>Partially applies<br>Fully applies                                                                                     |
| <b>2. It feels safe to make the transition; I believe that primary care has the conditions to carry out administration effectively.</b>                                   | Does not apply at all<br><br>Partially applies<br>Fully applies                                                                                     |
| <b>3. Has the staff in primary care been positive about receiving patients for Tysabri administration?</b>                                                                | Don't know / Cannot answer<br>Does not apply at all<br>Partially applies<br>Fully applies                                                           |
| <b>4. How often does the staff in primary care contact you with questions regarding Tysabri SC administration?</b>                                                        | Never<br><br>Rarely<br>Occasionally<br>Often                                                                                                        |
| <b>5. It is easy to inform the patient about the transition from Tysabri administration at the hospital to administration in primary care.</b>                            | Does not apply at all, it is never easy<br>Partially applies<br>Applies well, it is usually easy<br>Fully applies, it is always easy                |
| <b>6. The information you have about the transition of Tysabri SC administration from hospital to primary care is sufficient to inform patients about the transition.</b> | Does not apply at all, I lack information<br><br>Partially applies, but I wish for more information<br>Fully applies, I have sufficient information |

| Variable Name                                                                                                                                                                                                                                | Answer Options                                                                                                                                                       |
|----------------------------------------------------------------------------------------------------------------------------------------------------------------------------------------------------------------------------------------------|----------------------------------------------------------------------------------------------------------------------------------------------------------------------|
| <b>7. How often does the patient return to your clinic with questions about their illness or treatment outside of regular visits?</b>                                                                                                        | Never<br>Rarely<br>Occasionally<br>Often                                                                                                                             |
| <b>8. The transition to Tysabri SC administration in primary care is positive for us at the treatment clinic from a time-saving perspective.</b>                                                                                             | Does not apply at all, no time savings<br>Partially applies, some time savings<br>Applies well, time savings are achieved<br>Fully applies, significant time savings |
| <b>9. What proportion of patients who have been asked to switch from hospital treatment to treatment in primary care, including those not participating in the study, are positive about the transition?</b>                                 | <50%<br>50–65%<br>66–80%<br>81–90%<br>91–95%<br>>95%                                                                                                                 |
| <b>10. I perceive that there are more advantages with administration in primary care for the patients involved compared to Tysabri administration at the hospital, beyond the possibility of time savings, such as patient satisfaction.</b> | Does not apply at all<br>Partially applies<br>Applies well<br>Fully applies                                                                                          |

---

*Tysabri\_Figures\_for\_analysis-uppdaterad*

---

| Variable Name                                                            | Answer Options                                                                                                               |
|--------------------------------------------------------------------------|------------------------------------------------------------------------------------------------------------------------------|
| <b>1. Treatment with Tysabri disrupts or limits my daily activities.</b> | Does not apply at all<br>Partially applies<br>"Applies well, it is often limiting"<br>"Fully applies, it is always limiting" |

| Variable Name                                                                                                                                                                                                                 | Answer Options                                                                                                            |
|-------------------------------------------------------------------------------------------------------------------------------------------------------------------------------------------------------------------------------|---------------------------------------------------------------------------------------------------------------------------|
| 2. On the days I receive treatment, it affects my attendance at work.                                                                                                                                                         | Always<br>Sometimes<br>Never                                                                                              |
| 3. On the days I receive treatment, I need to be away from work for:                                                                                                                                                          | <1 hour<br>1–2 hours<br>2–3 hours<br>3–4 hours<br>4–5 hours<br>5–6 hours<br>>6 hours                                      |
| 4. When I need to be away from work for my treatment, it is in the form of:                                                                                                                                                   | Vacation<br>Overtime / Compensated Time / Flex Time<br>Sick leave                                                         |
| 5. How much total time does it take for you to receive your subcutaneous Tysabri treatment at the hospital (From the time you arrive at the hospital until you leave)? — SC                                                   | <15 minutes<br>15–30 minutes<br>30–45 minutes<br>45–60 minutes<br>60–75 minutes<br>>75 minutes                            |
| 6. How much total time does it take for you to receive your intravenous Tysabri treatment at the hospital (From the time you arrive at the hospital until you leave)? — IV                                                    | 1–1.5 hours<br>1.5–2 hours<br>2–2.5 hours<br>>2.5 hours                                                                   |
| 7. How much time have you spent traveling to and from the hospital for your treatment? (From the time you leave home or work until you arrive at the hospital, plus the return trip back, not including time at the hospital) | <15 minutes<br>15–30 minutes<br>30–45 minutes<br>45 minutes–1 hour<br>1–1.5 hours<br>1.5–2 hours<br>2–3 hours<br>>3 hours |
| 8. I perceive the time spent, travel time plus time at the hospital, for each treatment session with IV or SC Tysabri as negative.                                                                                            | Does not apply at all                                                                                                     |

| Variable Name                                                                                                                                                                                                            | Answer Options                                                                                                                                                                                                                                                          |
|--------------------------------------------------------------------------------------------------------------------------------------------------------------------------------------------------------------------------|-------------------------------------------------------------------------------------------------------------------------------------------------------------------------------------------------------------------------------------------------------------------------|
| <p><b>9. From a time perspective, I perceive that subcutaneous Tysabri treatment is an advantage compared to intravenous treatment.</b></p>                                                                              | <p>Partially applies<br/> "Applies well, it often feels negative"<br/> "Fully applies, it is always negative"</p>                                                                                                                                                       |
| <p><b>10. How often do you discuss questions regarding your illness or treatment with the nurses during the Tysabri IV infusion?</b></p>                                                                                 | <p>"Does not apply at all, it is not an advantage"<br/> "Partially applies, there is a slight advantage"<br/> "Applies well, it is an advantage"<br/> "Fully applies, it is a significant advantage"</p> <p>Never<br/> Rarely<br/> Sometimes<br/> Often<br/> Always</p> |
| <p><b>11. How often do you discuss questions regarding your illness or treatment with the nurses during the subcutaneous Tysabri injection?</b></p>                                                                      | <p>Never<br/> Rarely<br/> Sometimes<br/> Often<br/> Always</p>                                                                                                                                                                                                          |
| <p><b>12. The subcutaneous Tysabri injection treatment has not affected my ability to discuss relevant questions about my illness and treatment with healthcare staff compared to intravenous Tysabri treatment.</b></p> | <p>Does not apply at all, I have no opportunity to discuss<br/> "Partially applies, fewer opportunities to discuss"<br/> Applies well, I still have the opportunity to discuss<br/> Fully applies, I have more opportunities to discuss</p>                             |
| <p><b>13. When considering all factors, which option best describes you?</b></p>                                                                                                                                         | <p>I prefer the subcutaneous injection compared to the intravenous infusion in the arm.<br/> I prefer the intravenous infusion in the arm compared to the subcutaneous injection.</p>                                                                                   |

**Variable Name**

**Answer Options**

**14. If you think one option is better than the other, how much better do you think it is?**

I prefer neither one nor the other.

Much better

Better

Slightly better

**15. If you think one of the treatment options is better, what are the TWO main reasons?**

Is less emotionally stressful

Requires less time spent at the hospital

Causes less pain during administration

Feels more comfortable during administration of the treatment

I get more time to talk to the staff about my illness and treatment

Some other reason
